# Supplementary material for: Design of highly sensitive volatile organic compound sensors by controlling NiO loading on ZnO nanowire networks
Source: Royal Society of Chemistry journal article supplement (doi:10.1039/c1ra01001h), 2011-11-17
Supplement: c1ra01001h.pdf [file c1ra01001h.pdf]

Supporting information for  
Design of highly sensitive volatile organic compounds sensors by  
controlling NiO loading to ZnO nanowire networks

Chan Woong Na,<sup>a</sup> Hyung-Sik Woo,<sup>a</sup> and Jong-Heun Lee\*<sup>a</sup>

<sup>a</sup>*Department of Materials Science and Engineering, Korea University, Seoul 136-713, Korea*

*Email: [jongheun@korea.ac.kr](mailto:jongheun@korea.ac.kr)*

### Experimental

ZnO Nanowires were grown on the alumina substrates (size: 1.5 × 1.5 mm<sup>2</sup>) with two Au electrodes (on its top surface) by thermal evaporation using a mixture of ZnO powders (99.9%, Aldrich), graphite powders (<20 micron, Aldrich) and Sn powders (99.8%, Acros). The source (ZnO: graphite: Sn = 1 : 1 : 0.01 by weight%) was loaded in the Al<sub>2</sub>O<sub>3</sub> boat and was located in the center of the quartz tube (diameter: 2.5 cm). The alumina substrates were placed 5 cm downstream from the source. After evacuating the quartz tube to ~ 9 × 10<sup>-2</sup> torr using a rotary pump, the furnace temperature was increased to 900 °C. The ZnO nanowires were formed by a reaction between the source and Ar-O<sub>2</sub> mixture gas (Ar: 100 sccm, O<sub>2</sub>: 1 sccm). The NiO-decorated ZnO nanowires were prepared using the following procedures. The as-grown ZnO nanowires on the patterned Al<sub>2</sub>O<sub>3</sub> substrates and NiCl<sub>2</sub> powders (99.99%, Aldrich) were placed in the left and right part of Al<sub>2</sub>O<sub>3</sub> boat (length 4 cm), respectively. After evacuating the quartz tube to ~ 9 × 10<sup>-2</sup> torr using a rotary pump, the furnace temperature was increased to 500 °C. The lenticular/angular configuration of nano-scale NiO islands could be coated on the surface of the ZnO nanowires by a reaction between the source and Ar gas (Ar: 200 sccm). The Ni-doped ZnO nanowires were prepared using 2 zone quartz tube reactor. NiCl<sub>2</sub> (99.99%, Aldrich) powders were located at the 1<sup>st</sup> zone (temperature: 600 °C). The mixture between ZnO powders (99.9%, Aldrich), graphite powders (< 20 micron, Aldrich) and Sn powders (99.8%, Acros) were located at the 2<sup>nd</sup> zone (temperature: 900 °C). An alumina substrate was located on the top of the mixture. The distance between NiCl<sub>2</sub> and the mixture 10 cm. Argon gas was flowed while increasing or decreasing the temperature of the reactor. The Ni-doped ZnO nanowires were formed by a reaction between the sources and Ar-O<sub>2</sub> mixture gas (Ar: 100 sccm, O<sub>2</sub>:1 sccm).

For X-ray analysis, ZnO, NiO-decorated ZnO and Ni-doped ZnO nanowires were grown on a large area of Si substrates using the same thermal evaporation procedure.

**Characterization:**

The structural properties were examined by X-ray diffraction (XRD, Rigaku D/MAX-2500 V/PC), scanning electron microscopy (SEM, Hitachi S-4700), field-emission transmission electron microscopy (FE TEM, FEI TECNAI G2, 200 kV and JEOL JEM 3010, 300 kV) and Energy dispersive X-ray spectroscopy (EDS). The PL measurements were carried out at room temperature using a He-Cd laser ( $\lambda = 325$  nm) as the excitation source. The chemical states of the films were determined by X-ray photoelectron spectroscopy (ULVAC-PHI, PHI 5000 VersaProbe) with an Al Ka radiation (1486.6 eV) source. The binding energies were corrected for specimen charging by referencing the C 1s peak to 284.6 eV.

### SEM and TEM analyses of pristine ZnO NWs:

The ZnO NWs were synthesized on an alumina substrate with two gold electrodes (Fig. S1a). The diameter was 50-80 nm, the length was approximately tens of micrometers (Fig. S1b). The selected area electron diffraction (SAED) pattern confirmed that the highly crystalline ZnO NWs were grown in the  $[01\bar{1}0]$  direction (Fig. S1c). A lattice-resolved image of a single NW showed that highly crystalline  $(01\bar{1}0)$  fringes were separated by 2.81 Å (Fig. S1d).

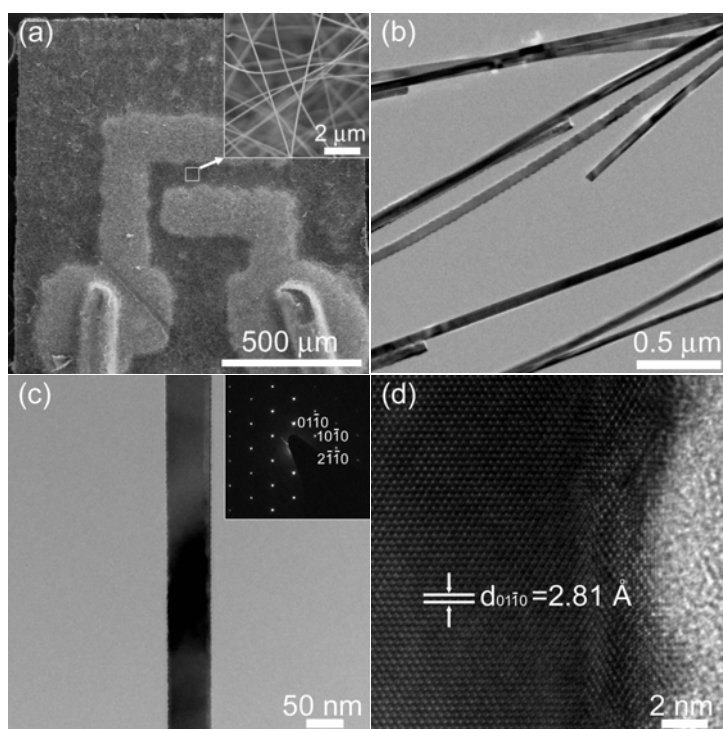

Fig. S1 Morphologies and crystal structures of the pristine ZnO NWs: (a) SEM images of ZnO NWs grown on an alumina substrate with two gold electrodes; (b) TEM images of ZnO NWs; (c) and (d) TEM images and electron diffraction pattern of ZnO NW.

### SEM and TEM analyses of Ni-doped ZnO NWs:

The Ni-doped ZnO NWs were fabricated on an alumina substrate with two gold electrodes (Fig. S2a). The diameter was 50-80 nm, and the length was approximately tens of micrometers (Fig. S2b). The selected area electron diffraction (SAED) pattern confirmed that highly crystalline Ni-doped ZnO NWs were grown in the  $[01\bar{1}0]$  direction (Fig. S2d). A lattice-resolved image of a single NW showed that highly crystalline  $(01\bar{1}0)$  fringes were separated by  $2.8 \text{ \AA}$  (Fig. S2e). High-angle annular dark field (HAADF) scanning TEM (STEM) and EDS-line scanning of Zn, Ni, and O (Fig. S2f) indicated that Ni was doped uniformly in the ZnO NW.

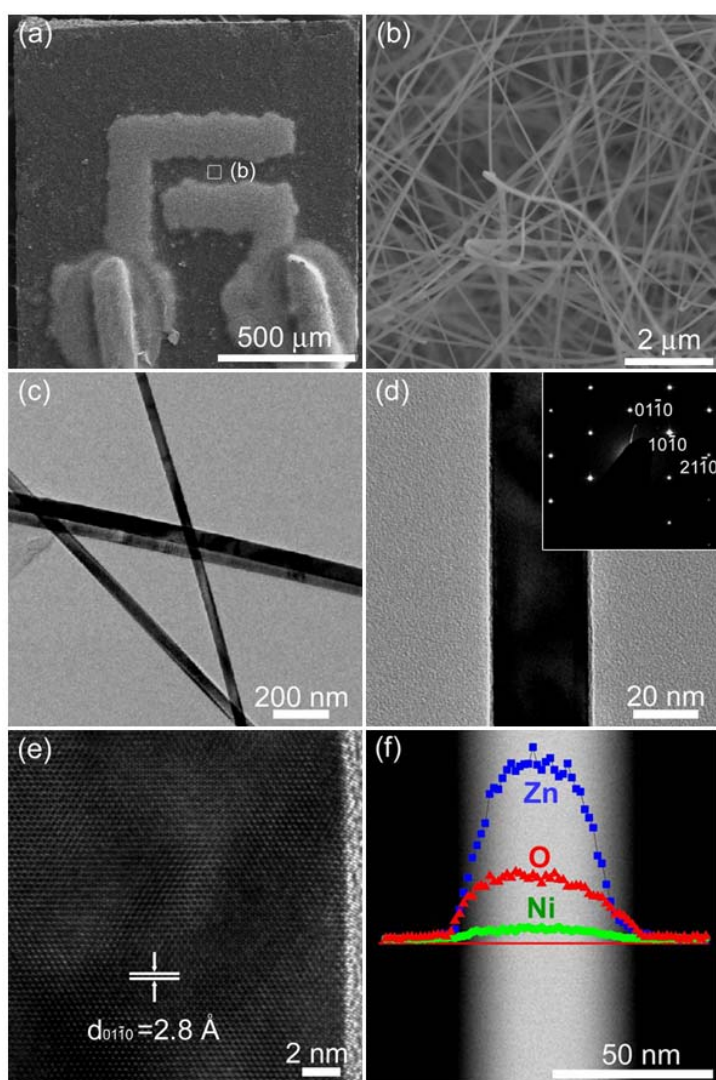

Fig. S2 Morphologies and crystal structures of the Ni-doped ZnO NWs: (a), (b) SEM images of Ni-doped ZnO NWs on the alumina substrate with two gold electrodes; (c) and (d) TEM images of Ni-doped ZnO NWs; (e) a lattice image of Ni-doped ZnO NW; (f) high-angle annular dark field (HAADF) scanning TEM (STEM) image and EDS line scanning of Zn, Ni, and O.

### Photoluminescence:

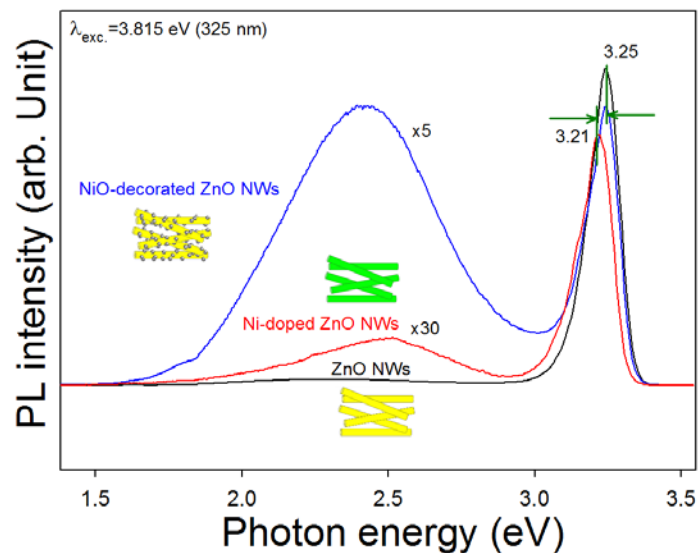

Fig. S3 Room-temperature PL spectrum of the ZnO NWs, NiO-decorated ZnO NWs, and Ni-doped ZnO NWs. (excitation wavelength: 325 nm (3.815 eV))

### X-ray diffraction analysis:

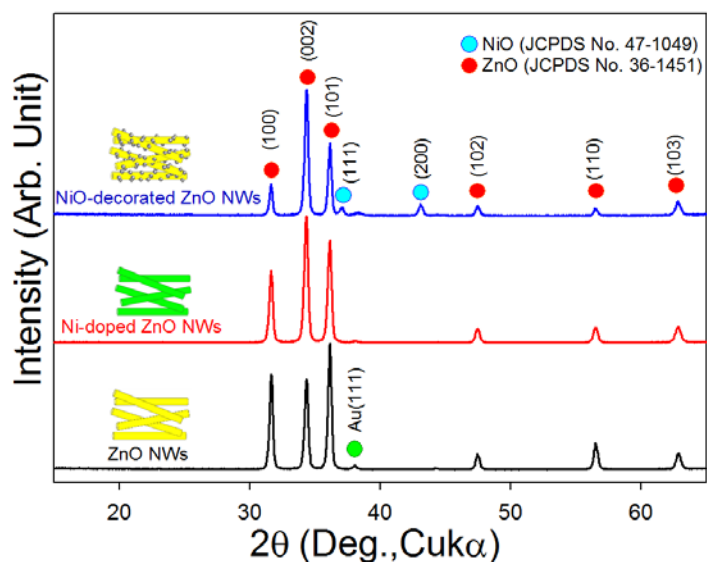

Fig. S4 X-ray diffraction patterns of pristine ZnO NWs, Ni-doped ZnO NWs, and NiO-decorated ZnO NWs.

### X-ray photoelectron spectroscopy:

The survey-scanned and fine-scanned XPS spectra of the ZnO, Ni-doped ZnO, and NiO-decorated ZnO NWs were measured. Figure 4Sb shows the Ni 2p spectra of the Ni-doped ZnO and NiO-decorated ZnO NWs. The Ni 2p<sub>3/2</sub> and Ni 2p<sub>1/2</sub> spectra of the Ni-doped ZnO NWs have five peaks from 854.7 to 879.1 eV. The red line (854.7 eV) and green line (856.2 eV) were assigned to the Ni<sup>2+</sup> and Ni<sup>3+</sup> bonding structures, respectively, which is consistent with the studies of NiO (K. S. Kim and N. Winograd, *Surface. Sci.*, 1974, **43**, 625).

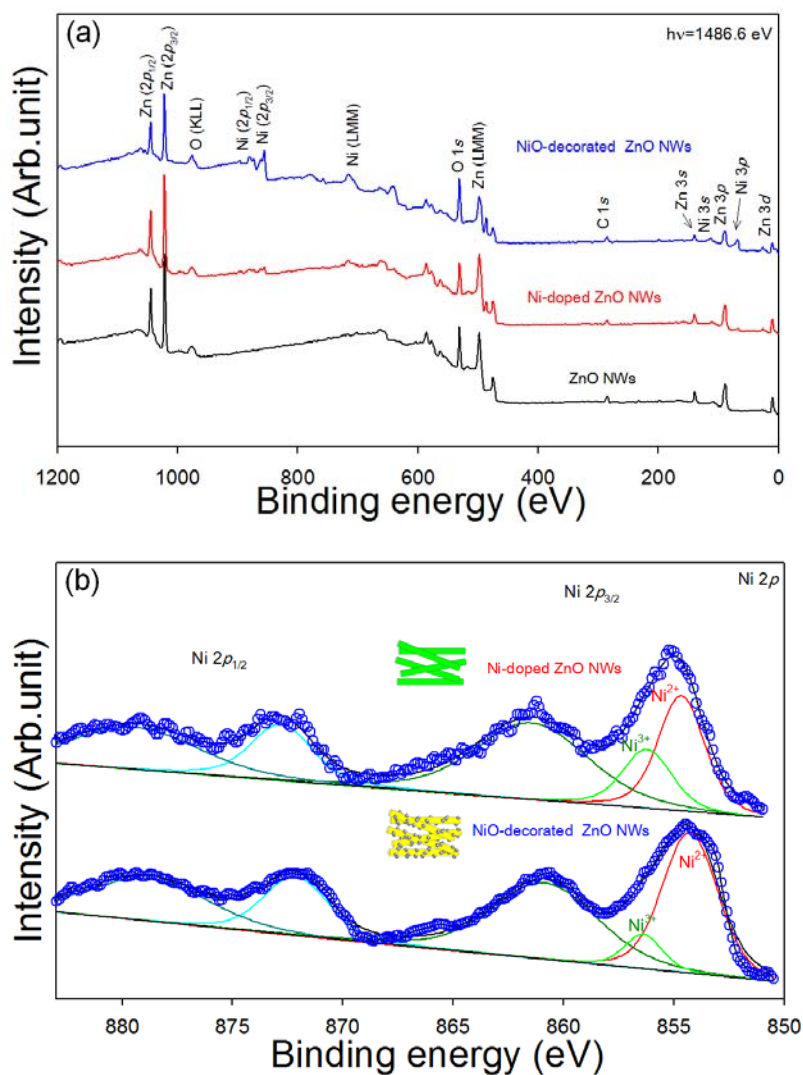

Fig. S5 X-ray photoelectron spectroscopy results: (a) full range spectra and (b) Ni 2p<sub>1/2</sub> and Ni 2p<sub>3/2</sub>.

**Selectivity analysis:**

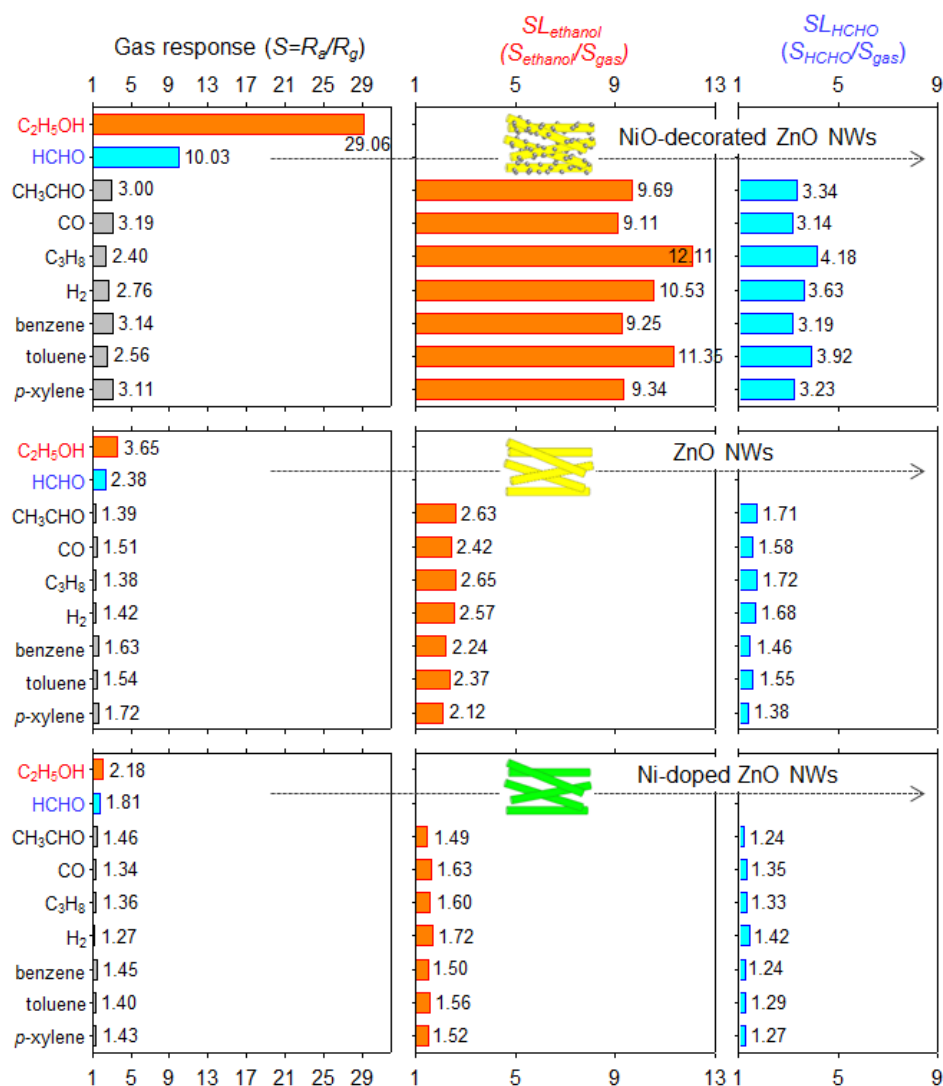

Fig. S6 The responses of the NiO-decorated ZnO, pristine ZnO, and Ni-doped ZnO NW network sensors to 5 ppm C<sub>2</sub>H<sub>5</sub>OH, HCHO, CH<sub>3</sub>CHO, CO, C<sub>3</sub>H<sub>8</sub>, H<sub>2</sub>, benzene, toluene, and p-xylene at 450 °C. The selectivity to 5 ppm C<sub>2</sub>H<sub>5</sub>OH (or HCHO) was defined as the ratio between the gas responses to 5 ppm C<sub>2</sub>H<sub>5</sub>OH (or HCHO) and those to other interfering gases ( $SL_{ethanol} = S_{ethanol}/S_{gas}$ ,  $SL_{HCHO} = S_{HCHO}/S_{gas}$ ).
